# Supplementary material for: Quantifying biological carbon pump pathways with a data-constrained mechanistic model ensemble approach
Source: Copernicus journal article supplement (doi:10.5194/bg-19-3595-2022), 2022-08-05
Supplement: Supplementary file [file bg-19-3595-2022-supplement-title-page.pdf › bg-19-3595-2022-supplement-title-page.pdf]

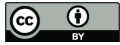

*Supplement of*

## **Quantifying biological carbon pump pathways with a data-constrained mechanistic model ensemble approach**

**Michael R. Stukel et al.**

*Correspondence to:* Michael R. Stukel (mstukel@fsu.edu)

- bg-19-3595-2022-supplement-title-page.pdf
- Stukel\_NEMURObcp - Draft 5.3 - Supplement
  - Supp Fig A1.jpg
  - Supp Table 1.xlsx
  - Supp Table 2.xlsx
  - Supp Table 3.xlsx
  - Supp Table 4.xlsx
  - Supp Table 5.xlsx
  - Supp Table 6.xlsx
  - Supp Table 7.xlsx
  - Supplement.pdf

The copyright of individual parts of the supplement might differ from the article licence.
